# Supplementary material for: BCG hydrogel promotes CTSS-mediated antigen processing and presentation, thereby suppressing metastasis and prolonging survival in melanoma
Source: PubMed Central journal article supplement (PMC9226922; doi:10.1136/jitc-2021-004133), 2022-06-22
Supplement: jitc-2021-004133supp002.pdf [file jitc-2021-004133supp002.pdf]

## BCG hydrogel promotes CTSS-mediated antigen processing and presentation, thereby suppressing metastasis and prolonging survival in melanoma

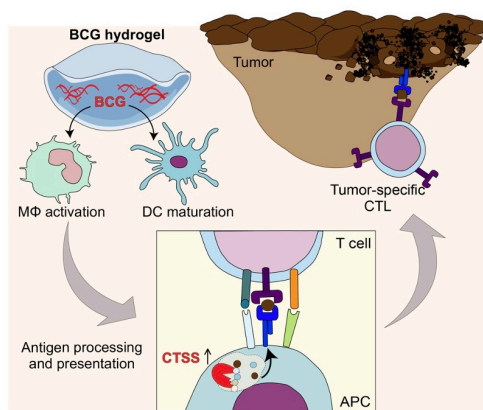

### Authors

Mirela Kremenovic, Alfred A. Chan, Bing Feng, Lukas Bärswyl, Steve Robatel, Thomas Gruber, Li Tang, Delphine J. Lee, Mirjam Schenk.

### Correspondence

mirjam.schenk@pathology.unibe.ch

### In Brief

We are the first to formulate a BCG lysate-containing hydrogel (BCG hydrogel) that reduces the metastatic potential of B16F10 melanoma and increases survival of tumor-bearing mice. BCG hydrogel promotes cathepsin S (CTSS) activity in macrophages and dendritic cells, resulting in enhanced antigen processing and presentation of tumor-associated antigens.
